# Supplementary material for: Dietary Supplementation with an Extract of Aloysia citrodora (Lemon verbena) Improves Sleep Quality in Healthy Subjects: A Randomized Double-Blind Controlled Study
Source: MDPI journal article supplement (doi:10.3390/nu16101523), 2024-05-18
Supplement: s1 [file s1]

**Supplementary Table S1.** Evolution of biochemical variables in relation to product safety in the two study groups.

|              |    | Creatinine (mg/dl) |                       | AST (UI/l)    |                 | ALT (UI/l)    |                 | GTT (UI/l)    |                 |
|--------------|----|--------------------|-----------------------|---------------|-----------------|---------------|-----------------|---------------|-----------------|
|              |    | Mean ± SD          | Abnormal values       | Mean ± SD     | Abnormal values | Mean ± SD     | Abnormal values | Mean ± SD     | Abnormal values |
| Placebo      | V1 | 0.9 ± 0.13         | S6: 1.28<br>S59: 1.25 | 18.39 ± 3.96  |                 | 20.32 ± 9.98  |                 | 19.86 ± 14.56 | S73: 82.3       |
|              | V3 | 0.78 ± 0.12        |                       | 21.24 ± 17.16 | S43: 119        | 17.98 ± 9.3   |                 | 18.9 ± 16.29  | S69: 86.9       |
| Experimental | V1 | 0.93 ± 0.15        | S33: 1.4              | 19.32 ± 5.11  |                 | 19.89 ± 11.35 | S30: 60.7       | 18.02 ± 12.47 | S13: 76.5       |
|              | V3 | 0.82 ± 0.13        |                       | 18.77 ± 6     |                 | 19.34 ± 12.03 |                 | 16.29 ± 9.87  | S13: 63.4       |

S: Study subject who has had abnormal values
